# Supplementary material for: Potential of a New Bacteriophage to Control <em>Klebsiella pneumoniae</em>: Preliminary Studies to Control Urinary Tract Infections
Source: Preprints.org preprint supplement (doi:10.20944/preprints202401.0492.v1), 2024-01-08
Supplement: Supplementary file 3 [file supplementary]

| **Table S1.** Coding sequences identified in KP-1 phage. | | | | |  |  |
| --- | --- | --- | --- | --- | --- | --- |
| **gene** | **start** | **stop** | **frame** | **Region** | **Putative function** | **PHROGs category** |
| OJRRIMKN_0001 | 158 | 3 | - | CDS | starvation-inducible transcriptional regulator | transcription regulation |
| OJRRIMKN_0002 | 411 | 130 | - | CDS | lysis inhibition | lysis |
| OJRRIMKN_0003 | 910 | 518 | - | CDS | hypothetical protein | unknown function |
| OJRRIMKN_0004 | 1535 | 927 | - | CDS | thymidine kinase | other |
| OJRRIMKN_0005 | 1725 | 1528 | - | CDS | hypothetical protein | unknown function |
| OJRRIMKN_0006 | 2005 | 1718 | - | CDS | hypothetical protein | unknown function |
| OJRRIMKN_0007 | 2481 | 2008 | - | CDS | phosphatase | other |
| OJRRIMKN_0008 | 2659 | 2471 | - | CDS | hypothetical protein | unknown function |
| OJRRIMKN_0009 | 2930 | 2814 | - | CDS | hypothetical protein | unknown function |
| OJRRIMKN_0010 | 3253 | 2930 | - | CDS | valyl tRNA synthetase modifier | DNA, RNA and nucleotide metabolism |
| OJRRIMKN_0011 | 3853 | 3263 | - | CDS | hypothetical protein | unknown function |
| OJRRIMKN_0012 | 3996 | 3850 | - | CDS | hypothetical protein | unknown function |
| OJRRIMKN_0013 | 4402 | 4007 | - | CDS | hypothetical protein | unknown function |
| OJRRIMKN_0014 | 5111 | 4470 | - | CDS | unknown function | unknown function |
| OJRRIMKN_0015 | 5730 | 5176 | - | CDS | hypothetical protein | unknown function |
| OJRRIMKN_0016 | 5914 | 5732 | - | CDS | hypothetical protein | unknown function |
| OJRRIMKN_0017 | 6120 | 5923 | - | CDS | hypothetical protein | unknown function |
| OJRRIMKN_0018 | 7504 | 6158 | - | CDS | PhoH-like phosphate starvation-inducible | other |
| OJRRIMKN_0019 | 8038 | 7514 | - | CDS | HNH endonuclease | DNA, RNA and nucleotide metabolism |
| OJRRIMKN_0020 | 8496 | 8038 | - | CDS | hypothetical protein | unknown function |
| OJRRIMKN_0021 | 8923 | 8528 | - | CDS | endolysin | lysis |
| OJRRIMKN_0022 | 9392 | 8991 | - | CDS | hypothetical protein | unknown function |
| OJRRIMKN_0023 | 9770 | 9447 | - | CDS | hypothetical protein | unknown function |
| OJRRIMKN_0024 | 10073 | 9810 | - | CDS | hypothetical protein | unknown function |
| OJRRIMKN_0025 | 10403 | 10143 | - | CDS | hypothetical protein | unknown function |
| OJRRIMKN_0026 | 10836 | 10405 | - | CDS | hypothetical protein | unknown function |
| OJRRIMKN_0027 | 11100 | 10846 | - | CDS | hypothetical protein | unknown function |
| OJRRIMKN_0028 | 11287 | 11114 | - | CDS | hypothetical protein | unknown function |
| OJRRIMKN_0029 | 11631 | 11284 | - | CDS | hypothetical protein | unknown function |
| OJRRIMKN_0030 | 11956 | 11612 | - | CDS | hypothetical protein | unknown function |
| OJRRIMKN_0031 | 13107 | 11953 | - | CDS | hypothetical protein | unknown function |
| OJRRIMKN_0032 | 13120 | 13848 | + | CDS | homing endonuclease | DNA, RNA and nucleotide metabolism |
| OJRRIMKN_0033 | 14095 | 13841 | - | CDS | hypothetical protein | unknown function |
| OJRRIMKN_0034 | 14241 | 14095 | - | CDS | hypothetical protein | unknown function |
| OJRRIMKN_0035 | 14489 | 14238 | - | CDS | hypothetical protein | unknown function |
| OJRRIMKN_0036 | 14839 | 14561 | - | CDS | hypothetical protein | unknown function |
| OJRRIMKN_0037 | 15180 | 14923 | - | CDS | hypothetical protein | unknown function |
| OJRRIMKN_0038 | 15755 | 15180 | - | CDS | hypothetical protein | unknown function |
| OJRRIMKN_0039 | 16161 | 15763 | - | CDS | hypothetical protein | unknown function |
| OJRRIMKN_0040 | 16536 | 16336 | - | CDS | hypothetical protein | unknown function |
| OJRRIMKN_0041 | 17527 | 16613 | - | CDS | hypothetical protein | unknown function |
| OJRRIMKN_0042 | 18051 | 17524 | - | CDS | hypothetical protein | unknown function |
| OJRRIMKN_0043 | 18374 | 18051 | - | CDS | hypothetical protein | unknown function |
| OJRRIMKN_0044 | 18660 | 18403 | - | CDS | hypothetical protein | unknown function |
| OJRRIMKN_0045 | 19045 | 18662 | - | CDS | hypothetical protein | unknown function |
| OJRRIMKN_0046 | 19463 | 19056 | - | CDS | nudix hydrolase | other |
| OJRRIMKN_0047 | 19709 | 19464 | - | CDS | hypothetical protein | unknown function |
| OJRRIMKN_0048 | 19957 | 19706 | - | CDS | hypothetical protein | unknown function |
| OJRRIMKN_0049 | 20243 | 19950 | - | CDS | hypothetical protein | unknown function |
| OJRRIMKN_0050 | 20575 | 20240 | - | CDS | hypothetical protein | unknown function |
| OJRRIMKN_0051 | 20726 | 20586 | - | CDS | hypothetical protein | unknown function |
| OJRRIMKN_0052 | 21561 | 21022 | - | CDS | hypothetical protein | unknown function |
| OJRRIMKN_0053 | 22192 | 21569 | - | CDS | RNA ligase | DNA, RNA and nucleotide metabolism |
| OJRRIMKN_0054 | 22516 | 22244 | - | CDS | tail fiber chaperone | tail |
| OJRRIMKN_0055 | 23214 | 22519 | - | CDS | deoxynucleoside monophosphate kinase | other |
| OJRRIMKN_0056 | 23744 | 23214 | - | CDS | tail tube | tail |
| OJRRIMKN_0057 | 24114 | 24902 | + | CDS | hypothetical protein | unknown function |
| OJRRIMKN_0058 | 25793 | 24939 | - | CDS | DNA end protector | DNA, RNA and nucleotide metabolism |
| OJRRIMKN_0059 | 26276 | 25809 | - | CDS | head closure | connector |
| OJRRIMKN_0060 | 26327 | 26881 | + | CDS | baseplate wedge subunit | tail |
| OJRRIMKN_0061 | 26878 | 28647 | + | CDS | baseplate hub subunit and tail lysozyme | tail |
| OJRRIMKN_0062 | 28649 | 30715 | + | CDS | hypothetical protein | unknown function |
| OJRRIMKN_0063 | 30747 | 32672 | + | CDS | baseplate wedge subunit | tail |
| OJRRIMKN_0064 | 32753 | 35839 | + | CDS | baseplate wedge subunit | tail |
| OJRRIMKN_0065 | 35840 | 36832 | + | CDS | baseplate wedge subunit | tail |
| OJRRIMKN_0066 | 36842 | 37705 | + | CDS | baseplate wedge tail fiber protein connector | tail |
| OJRRIMKN_0067 | 37702 | 39519 | + | CDS | baseplate wedge subunit | tail |
| OJRRIMKN_0068 | 39519 | 40187 | + | CDS | baseplate wedge subunit | tail |
| OJRRIMKN_0069 | 40197 | 41582 | + | CDS | tail collar fiber protein | tail |
| OJRRIMKN_0070 | 41596 | 43347 | + | CDS | fibritin neck whisker | tail |
| OJRRIMKN_0071 | 43386 | 44312 | + | CDS | head-tail adaptor Ad2 | connector |
| OJRRIMKN_0072 | 44322 | 45068 | + | CDS | head closure Hc2 | connector |
| OJRRIMKN_0073 | 45149 | 45973 | + | CDS | tail sheath stabilizer | tail |
| OJRRIMKN_0074 | 45973 | 46512 | + | CDS | terminase small subunit | head and packaging |
| OJRRIMKN_0075 | 46481 | 48310 | + | CDS | terminase large subunit | head and packaging |
| OJRRIMKN_0076 | 48330 | 50321 | + | CDS | tail sheath | tail |
| OJRRIMKN_0077 | 50370 | 50855 | + | CDS | tail tube | tail |
| OJRRIMKN_0078 | 50911 | 52485 | + | CDS | portal protein | head and packaging |
| OJRRIMKN_0079 | 52485 | 52727 | + | CDS | prohead | head and packaging |
| OJRRIMKN_0080 | 52736 | 53140 | + | CDS | head scaffolding protein | head and packaging |
| OJRRIMKN_0081 | 53143 | 53790 | + | CDS | head maturation protease | head and packaging |
| OJRRIMKN_0082 | 53823 | 54611 | + | CDS | head scaffolding protein | head and packaging |
| OJRRIMKN_0083 | 54631 | 56199 | + | CDS | major head protein | head and packaging |
| OJRRIMKN_0084 | 56285 | 56920 | + | CDS | homing endonuclease | DNA, RNA and nucleotide metabolism |
| OJRRIMKN_0085 | 56953 | 58242 | + | CDS | major head protein | head and packaging |
| OJRRIMKN_0086 | 58547 | 58966 | + | CDS | UvsY-like recombination mediator | DNA, RNA and nucleotide metabolism |
| OJRRIMKN_0087 | 58966 | 59142 | + | CDS | unknown function | unknown function |
| OJRRIMKN_0088 | 59810 | 59577 | - | CDS | DNA helicase | DNA, RNA and nucleotide metabolism |
| OJRRIMKN_0089 | 61318 | 59819 | - | CDS | DNA helicase | DNA, RNA and nucleotide metabolism |
| OJRRIMKN_0090 | 61389 | 62012 | + | CDS | minor head protein inhibitor of protease | head and packaging |
| OJRRIMKN_0091 | 62105 | 62416 | + | CDS | hypothetical protein | unknown function |
| OJRRIMKN_0092 | 62456 | 63025 | + | CDS | hypothetical protein | unknown function |
| OJRRIMKN_0093 | 63054 | 64115 | + | CDS | tail protein | tail |
| OJRRIMKN_0094 | 64126 | 64401 | + | CDS | Hoc-like head decoration | head and packaging |
| OJRRIMKN_0095 | 64415 | 64933 | + | CDS | 5'-3' deoxyribonucleotidase | moron, auxiliary metabolic gene and host takeover |
| OJRRIMKN_0096 | 65429 | 64965 | - | CDS | 5'-3' deoxyribonucleotidase | moron, auxiliary metabolic gene and host takeover |
| OJRRIMKN_0097 | 66318 | 65479 | - | CDS | hypothetical protein | unknown function |
| OJRRIMKN_0098 | 66433 | 67308 | + | CDS | hypothetical protein | unknown function |
| OJRRIMKN_0099 | 67341 | 67658 | + | CDS | hypothetical protein | unknown function |
| OJRRIMKN_0100 | 67655 | 67831 | + | CDS | hypothetical protein | unknown function |
| OJRRIMKN_0101 | 67828 | 68154 | + | CDS | hypothetical protein | unknown function |
| OJRRIMKN_0102 | 68156 | 68512 | + | CDS | hypothetical protein | unknown function |
| OJRRIMKN_0103 | 68512 | 69036 | + | CDS | decoy of host sigma70 | moron, auxiliary metabolic gene and host takeover |
| OJRRIMKN_0104 | 69040 | 70059 | + | CDS | RNA ligase | DNA, RNA and nucleotide metabolism |
| OJRRIMKN_0105 | 70049 | 70630 | + | CDS | DprA-like DNA recombination-mediator protein | DNA, RNA and nucleotide metabolism |
| OJRRIMKN_0106 | 70699 | 71142 | + | CDS | hypothetical protein | unknown function |
| OJRRIMKN_0107 | 71220 | 71480 | + | CDS | hypothetical protein | unknown function |
| OJRRIMKN_0108 | 71490 | 71939 | + | CDS | hypothetical protein | unknown function |
| OJRRIMKN_0109 | 71967 | 73400 | + | CDS | nicotinamide phosphoribosyl transferase | other |
| OJRRIMKN_0110 | 73387 | 73689 | + | CDS | hypothetical protein | unknown function |
| OJRRIMKN_0111 | 73686 | 74537 | + | CDS | DNA methyltransferase | other |
| OJRRIMKN_0112 | 74546 | 74821 | + | CDS | hypothetical protein | unknown function |
| OJRRIMKN_0113 | 74853 | 75335 | + | CDS | endonuclease VII | DNA, RNA and nucleotide metabolism |
| OJRRIMKN_0114 | 75332 | 77455 | + | CDS | NrdD-like anaerobic ribonucleotide reductase large subunit | moron, auxiliary metabolic gene and host takeover |
| OJRRIMKN_0115 | 77523 | 77765 | + | CDS | hypothetical protein | unknown function |
| OJRRIMKN_0116 | 77762 | 78256 | + | CDS | hypothetical protein | unknown function |
| OJRRIMKN_0117 | 78256 | 78462 | + | CDS | hypothetical protein | unknown function |
| OJRRIMKN_0118 | 78483 | 78734 | + | CDS | hypothetical protein | unknown function |
| OJRRIMKN_0119 | 78795 | 78986 | + | CDS | hypothetical protein | unknown function |
| OJRRIMKN_0120 | 79013 | 79654 | + | CDS | homing endonuclease | DNA, RNA and nucleotide metabolism |
| OJRRIMKN_0121 | 79651 | 80142 | + | CDS | anaerobic ribonucleotide reductase small subunit | DNA, RNA and nucleotide metabolism |
| OJRRIMKN_0122 | 80212 | 81171 | + | CDS | hypothetical protein | unknown function |
| OJRRIMKN_0123 | 81214 | 81882 | + | CDS | hypothetical protein | unknown function |
| OJRRIMKN_0124 | 81842 | 82123 | + | CDS | hypothetical protein | unknown function |
| OJRRIMKN_0125 | 82120 | 82419 | + | CDS | hypothetical protein | unknown function |
| OJRRIMKN_0126 | 82499 | 86272 | + | CDS | tail fiber protein proximal subunit | tail |
| OJRRIMKN_0127 | 86272 | 87396 | + | CDS | long tail fiber protein proximal connector | tail |
| OJRRIMKN_0128 | 87446 | 88114 | + | CDS | hinge connector of long tail fiber protein distal connector | tail |
| OJRRIMKN_0129 | 88123 | 92103 | + | CDS | tail fiber protein | tail |
| OJRRIMKN_0130 | 92140 | 92667 | + | CDS | tail fiber adhesin | tail |
| OJRRIMKN_0131 | 92784 | 93431 | + | CDS | holin | lysis |
| OJRRIMKN_0132 | 93701 | 93432 | - | CDS | hypothetical protein | unknown function |
| OJRRIMKN_0133 | 93988 | 93698 | - | CDS | hypothetical protein | unknown function |
| OJRRIMKN_0134 | 94785 | 93988 | - | CDS | hypothetical protein | unknown function |
| OJRRIMKN_0135 | 95092 | 94865 | - | CDS | hypothetical protein | unknown function |
| OJRRIMKN_0136 | 95421 | 95089 | - | CDS | hypothetical protein | unknown function |
| OJRRIMKN_0137 | 95533 | 95396 | - | CDS | hypothetical protein | unknown function |
| OJRRIMKN_0138 | 95826 | 95578 | - | CDS | hypothetical protein | unknown function |
| OJRRIMKN_0139 | 96300 | 95863 | - | CDS | Ndd-like nucleoid disruption protein | DNA, RNA and nucleotide metabolism |
| OJRRIMKN_0140 | 96649 | 96275 | - | CDS | hypothetical protein | unknown function |
| OJRRIMKN_0141 | 97594 | 96695 | - | CDS | RIIB lysis inhibitor | lysis |
| OJRRIMKN_0142 | 99855 | 97594 | - | CDS | RIIA lysis inhibitor | lysis |
| OJRRIMKN_0143 | 100102 | 99866 | - | CDS | hypothetical protein | unknown function |
| OJRRIMKN_0144 | 100660 | 100106 | - | CDS | hypothetical protein | unknown function |
| OJRRIMKN_0145 | 102018 | 100732 | - | CDS | DNA topoisomerase II | DNA, RNA and nucleotide metabolism |
| OJRRIMKN_0146 | 103916 | 102018 | - | CDS | DNA topoisomerase II large subunit | DNA, RNA and nucleotide metabolism |
| OJRRIMKN_0147 | 104148 | 103984 | - | CDS | FmdB-like transcriptional regulator | transcription regulation |
| OJRRIMKN_0148 | 104588 | 104148 | - | CDS | unknown function | unknown function |
| OJRRIMKN_0149 | 105204 | 104611 | - | CDS | hypothetical protein | unknown function |
| OJRRIMKN_0150 | 105469 | 105191 | - | CDS | hypothetical protein | unknown function |
| OJRRIMKN_0151 | 106062 | 105466 | - | CDS | hypothetical protein | unknown function |
| OJRRIMKN_0152 | 106431 | 106102 | - | CDS | hypothetical protein | unknown function |
| OJRRIMKN_0153 | 106715 | 106491 | - | CDS | hypothetical protein | unknown function |
| OJRRIMKN_0154 | 107052 | 106789 | - | CDS | hypothetical protein | unknown function |
| OJRRIMKN_0155 | 107443 | 107141 | - | CDS | hypothetical protein | unknown function |
| OJRRIMKN_0156 | 108162 | 107881 | - | CDS | tail protein | tail |
| OJRRIMKN_0157 | 108830 | 108159 | - | CDS | exonuclease | DNA, RNA and nucleotide metabolism |
| OJRRIMKN_0158 | 109111 | 108827 | - | CDS | hypothetical protein | unknown function |
| OJRRIMKN_0159 | 109420 | 109112 | - | CDS | hypothetical protein | unknown function |
| OJRRIMKN_0160 | 110773 | 109445 | - | CDS | Dda-like helicase | DNA, RNA and nucleotide metabolism |
| OJRRIMKN_0161 | 111060 | 110770 | - | CDS | hypothetical protein | unknown function |
| OJRRIMKN_0162 | 111778 | 111242 | - | CDS | nucleoside triphosphate pyrophosphohydrolase | DNA, RNA and nucleotide metabolism |
| OJRRIMKN_0163 | 112811 | 111786 | - | CDS | DNA primase | DNA, RNA and nucleotide metabolism |
| OJRRIMKN_0164 | 113075 | 112815 | - | CDS | DksA-like zinc-finger protein | other |
| OJRRIMKN_0165 | 113349 | 113131 | - | CDS | hypothetical protein | unknown function |
| OJRRIMKN_0166 | 113834 | 113346 | - | CDS | hypothetical protein | unknown function |
| OJRRIMKN_0167 | 114571 | 113840 | - | CDS | DNA methyltransferase | other |
| OJRRIMKN_0168 | 114944 | 114552 | - | CDS | hypothetical protein | unknown function |
| OJRRIMKN_0169 | 115177 | 114941 | - | CDS | hypothetical protein | unknown function |
| OJRRIMKN_0170 | 115524 | 115270 | - | CDS | hypothetical protein | unknown function |
| OJRRIMKN_0171 | 115873 | 115604 | - | CDS | hypothetical protein | unknown function |
| OJRRIMKN_0172 | 117353 | 115917 | - | CDS | DnaB-like replicative helicase | DNA, RNA and nucleotide metabolism |
| OJRRIMKN_0173 | 117683 | 117363 | - | CDS | head vertex assembly chaperone | head and packaging |
| OJRRIMKN_0174 | 118878 | 117721 | - | CDS | DNA repair protein | DNA, RNA and nucleotide metabolism |
| OJRRIMKN_0175 | 121652 | 118953 | - | CDS | DNA polymerase | DNA, RNA and nucleotide metabolism |
| OJRRIMKN_0176 | 122028 | 121699 | - | CDS | hypothetical protein | unknown function |
| OJRRIMKN_0177 | 122312 | 122025 | - | CDS | hypothetical protein | unknown function |
| OJRRIMKN_0178 | 122743 | 122381 | - | CDS | translation repressor | other |
| OJRRIMKN_0179 | 123310 | 122747 | - | CDS | clamp loader of DNA polymerase | DNA, RNA and nucleotide metabolism |
| OJRRIMKN_0180 | 124311 | 123313 | - | CDS | clamp loader of DNA polymerase | DNA, RNA and nucleotide metabolism |
| OJRRIMKN_0181 | 125035 | 124370 | - | CDS | DNA polymerase processivity factor | DNA, RNA and nucleotide metabolism |
| OJRRIMKN_0182 | 125331 | 125062 | - | CDS | RpbA RNA polymerase binding protein | DNA, RNA and nucleotide metabolism |
| OJRRIMKN_0183 | 126358 | 125387 | - | CDS | single strand DNA binding protein | DNA, RNA and nucleotide metabolism |
| OJRRIMKN_0184 | 127033 | 126374 | - | CDS | DNA helicase loader | DNA, RNA and nucleotide metabolism |
| OJRRIMKN_0185 | 127275 | 127030 | - | CDS | late promoter transcriptional regulator | transcription regulation |
| OJRRIMKN_0186 | 127542 | 127279 | - | CDS | transcriptional regulator | transcription regulation |
| OJRRIMKN_0187 | 128487 | 127552 | - | CDS | exonuclease | DNA, RNA and nucleotide metabolism |
| OJRRIMKN_0188 | 128792 | 129319 | + | CDS | late sigma transcription factor | transcription regulation |
| OJRRIMKN_0189 | 129316 | 129531 | + | CDS | hypothetical protein | unknown function |
| OJRRIMKN_0190 | 129524 | 129850 | + | CDS | hypothetical protein | unknown function |
| OJRRIMKN_0191 | 129887 | 130933 | + | CDS | SbcD-like subunit of palindrome specific endonuclease | DNA, RNA and nucleotide metabolism |
| OJRRIMKN_0192 | 130920 | 131207 | + | CDS | hypothetical protein | unknown function |
| OJRRIMKN_0193 | 131191 | 132882 | + | CDS | SbcC-like subunit of palindrome specific endonuclease | DNA, RNA and nucleotide metabolism |
| OJRRIMKN_0194 | 133588 | 132869 | - | CDS | homing endonuclease | DNA, RNA and nucleotide metabolism |
| OJRRIMKN_0195 | 133645 | 133839 | + | CDS | hypothetical protein | unknown function |
| OJRRIMKN_0196 | 133913 | 135622 | + | CDS | hypothetical protein | unknown function |
| OJRRIMKN_0197 | 135682 | 135972 | + | CDS | hypothetical protein | unknown function |
| OJRRIMKN_0198 | 135969 | 136199 | + | CDS | hypothetical protein | unknown function |
| OJRRIMKN_0199 | 136196 | 136453 | + | CDS | hypothetical protein | unknown function |
| OJRRIMKN_0200 | 136450 | 137028 | + | CDS | dihydrofolate reductase | DNA, RNA and nucleotide metabolism |
| OJRRIMKN_0201 | 137030 | 137905 | + | CDS | thymidylate synthase | DNA, RNA and nucleotide metabolism |
| OJRRIMKN_0202 | 137945 | 140197 | + | CDS | ribonucleotide reductase large subunit | DNA, RNA and nucleotide metabolism |
| OJRRIMKN_0203 | 140234 | 141409 | + | CDS | ribonucleoside diphosphate reductase small subunit | DNA, RNA and nucleotide metabolism |
| OJRRIMKN_0204 | 141372 | 141701 | + | CDS | unknown function | unknown function |
| OJRRIMKN_0205 | 141705 | 142070 | + | CDS | endonuclease | DNA, RNA and nucleotide metabolism |
| OJRRIMKN_0206 | 142051 | 143208 | + | CDS | RNA ligase and tail fiber protein attachment catalyst | tail |
| OJRRIMKN_0207 | 143217 | 143528 | + | CDS | Rz-like spanin | lysis |
| OJRRIMKN_0208 | 143525 | 143839 | + | CDS | Rz-like spanin | lysis |
| OJRRIMKN_0209 | 143824 | 143997 | + | CDS | hypothetical protein | unknown function |
| OJRRIMKN_0210 | 143994 | 144878 | + | CDS | polynucleotide kinase | other |
| OJRRIMKN_0211 | 144931 | 145467 | + | CDS | hypothetical protein | unknown function |
| OJRRIMKN_0212 | 145460 | 145744 | + | CDS | hypothetical protein | unknown function |
| OJRRIMKN_0213 | 145686 | 146240 | + | CDS | dCMP deaminase | DNA, RNA and nucleotide metabolism |
| OJRRIMKN_0214 | 146256 | 146597 | + | CDS | head morphogenesis | head and packaging |
| OJRRIMKN_0215 | 146608 | 146859 | + | CDS | hypothetical protein | unknown function |
| OJRRIMKN_0216 | 147174 | 147455 | + | CDS | hypothetical protein | unknown function |
| OJRRIMKN_0217 | 147465 | 147887 | + | CDS | hypothetical protein | unknown function |
| OJRRIMKN_0218 | 147929 | 148495 | + | CDS | hypothetical protein | unknown function |
| OJRRIMKN_0219 | 148506 | 148868 | + | CDS | hypothetical protein | unknown function |
| OJRRIMKN_0220 | 148868 | 149137 | + | CDS | hypothetical protein | unknown function |
| OJRRIMKN_0221 | 149263 | 149556 | + | CDS | hypothetical protein | unknown function |
| OJRRIMKN_0222 | 149559 | 149798 | + | CDS | hypothetical protein | unknown function |
| OJRRIMKN_0223 | 149783 | 149953 | + | CDS | hypothetical protein | unknown function |
| OJRRIMKN_0224 | 150257 | 150697 | + | CDS | hypothetical protein | unknown function |
| OJRRIMKN_0225 | 150694 | 150957 | + | CDS | hypothetical protein | unknown function |
| OJRRIMKN_0226 | 150959 | 151180 | + | CDS | hypothetical protein | unknown function |
| OJRRIMKN_0227 | 151177 | 151791 | + | CDS | unknown function | unknown function |
| OJRRIMKN_0228 | 151772 | 153301 | + | CDS | ATP-dependent DNA ligase | DNA, RNA and nucleotide metabolism |
| OJRRIMKN_0229 | 153378 | 153947 | + | CDS | hypothetical protein | unknown function |
| OJRRIMKN_0230 | 154036 | 154239 | + | CDS | hypothetical protein | unknown function |
| OJRRIMKN_0231 | 154242 | 154418 | + | CDS | hypothetical protein | unknown function |
| OJRRIMKN_0232 | 154415 | 154579 | + | CDS | hypothetical protein | unknown function |
| OJRRIMKN_0233 | 154660 | 154950 | + | CDS | hypothetical protein | unknown function |
| OJRRIMKN_0234 | 154961 | 155272 | + | CDS | hypothetical protein | unknown function |
| OJRRIMKN_0235 | 155259 | 155636 | + | CDS | hypothetical protein | unknown function |
| OJRRIMKN_0236 | 156742 | 155633 | - | CDS | baseplate hub | tail |
| OJRRIMKN_0237 | 156812 | 157387 | + | CDS | baseplate hub distal subunit | tail |
| OJRRIMKN_0238 | 157384 | 159174 | + | CDS | baseplate hub | tail |
| OJRRIMKN_0239 | 159185 | 160258 | + | CDS | baseplate tail tube cap | tail |
| OJRRIMKN_0240 | 160268 | 161131 | + | CDS | tail tube | tail |
| OJRRIMKN_0241 | 161160 | 161903 | + | CDS | baseplate hub | tail |
| OJRRIMKN_0242 | 161900 | 162454 | + | CDS | baseplate hub | tail |
| OJRRIMKN_0243 | 162455 | 162847 | + | CDS | baseplate wedge subunit | tail |
| OJRRIMKN_0244 | 163337 | 162882 | - | CDS | hypothetical protein | unknown function |
| OJRRIMKN_0245 | 163569 | 163345 | - | CDS | hypothetical protein | unknown function |
| OJRRIMKN_0246 | 163855 | 163571 | - | CDS | hypothetical protein | unknown function |
| OJRRIMKN_0247 | 164211 | 163927 | - | CDS | hypothetical protein | unknown function |
| OJRRIMKN_0248 | 164697 | 164227 | - | CDS | hypothetical protein | unknown function |
| OJRRIMKN_0249 | 164852 | 164694 | - | CDS | hypothetical protein | unknown function |
| OJRRIMKN_0250 | 165499 | 164849 | - | CDS | hypothetical protein | unknown function |
| OJRRIMKN_0251 | 167754 | 165538 | - | CDS | hypothetical protein | unknown function |
| OJRRIMKN_0252 | 168082 | 167762 | - | CDS | hypothetical protein | unknown function |
| OJRRIMKN_0253 | 168597 | 168082 | - | CDS | hypothetical protein | unknown function |
| OJRRIMKN_0254 | 168836 | 168597 | - | CDS | hypothetical protein | unknown function |
| OJRRIMKN_0255 | 169110 | 168823 | - | CDS | hypothetical protein | unknown function |
| OJRRIMKN_0256 | 169277 | 169110 | - | CDS | hypothetical protein | unknown function |
| OJRRIMKN_0257 | 169595 | 169317 | - | CDS | hypothetical protein | unknown function |
| OJRRIMKN_0258 | 170565 | 169654 | - | CDS | DNA methyltransferase | other |
| OJRRIMKN_0259 | 170819 | 170562 | - | CDS | hypothetical protein | unknown function |
| OJRRIMKN_0260 | 171064 | 170819 | - | CDS | hypothetical protein | unknown function |
| OJRRIMKN_0261 | 172068 | 171061 | - | CDS | nucleotidyltransferase | DNA, RNA and nucleotide metabolism |
| OJRRIMKN_0262 | 172445 | 172068 | - | CDS | hypothetical protein | unknown function |
| OJRRIMKN_0263 | 172669 | 172442 | - | CDS | hypothetical protein | unknown function |
| OJRRIMKN_0264 | 173270 | 172854 | - | CDS | hypothetical protein | unknown function |
| OJRRIMKN_0265 | 173542 | 173273 | - | CDS | hypothetical protein | unknown function |
| OJRRIMKN_0266 | 174669 | 173611 | - | CDS | cytidyltransferase | other |
| OJRRIMKN_0267 | 175760 | 174846 | - | CDS | lipoprotein | other |
| OJRRIMKN_0268 | 176095 | 175832 | - | CDS | starvation-inducible transcriptional regulator | transcription regulation |
